1 **Functional brain network dynamics of brooding in depression:**  
2 **insights from real-time fMRI neurofeedback**

3 Saampras Ganesan<sup>a,b,c,#</sup>, Masaya Misaki<sup>d,e</sup>, Andrew Zalesky<sup>a,b,1</sup>, Aki Tsuchiyagaito<sup>d,e,f,1</sup>

4

5 <sup>a</sup> Department of Psychiatry, Melbourne Medical School, Carlton, Victoria 3053, Australia

6 <sup>b</sup> Department of Biomedical Engineering, The University of Melbourne, Carlton, Victoria  
7 3053, Australia

8 <sup>c</sup> Contemplative Studies Centre, Melbourne School of Psychological Sciences, The  
9 University of Melbourne, Melbourne, Victoria 3010, Australia

10 <sup>d</sup> Laureate Institute for Brain Research, Tulsa, OK, USA

11 <sup>e</sup> Oxley College of Health and Natural Sciences, The University of Tulsa, Tulsa, OK,  
12 USA

13 <sup>f</sup> Research Center for Child Mental Development, Chiba University, Chiba, Japan

14 <sup>1</sup> Joint last authors.

15

16 # Corresponding Author:

17 Saampras Ganesan

18 Department of Biomedical Engineering, The University of Melbourne, Carlton, Victoria  
19 3053, Australia.

20 E-mail: [saampras@student.unimelb.edu.au](mailto:saampras@student.unimelb.edu.au)

21

## 22 **Funding**

23 This work has been supported in part by the Laureate Institute for Brain Research  
24 (LIBR), and the National Institute of General Medical Sciences Center Grant Award  
25 Number (2P20GM121312). The content is sole responsibility of the authors and does  
26 not necessarily represent the official views of the National Institutes of Health (NIH). SG  
27 is supported by Australian Research Training Program (RTP) scholarship and Graeme  
28 Clark Institute (GCI) top-up scholarship. AZ is supported by the Rebecca L. Cooper  
29 Fellowship.

30

## 31 **Acknowledgments**

32 The authors acknowledge Jerzy Bodurka, Ph.D. (1964–2021) for his intellectual and  
33 scientific contributions to the establishment of the EEG, structural and functional MRI,  
34 and neurofeedback processes at LIBR, that provided the foundation for the data  
35 collection, analysis, and interpretation of findings for the present work.

36

## 37 **Declaration of Competing Interest**

38 The authors report no declarations of competing interests.

39

40

41

## 42 **Abstract**

43 **Background:** Brooding is a critical symptom and prognostic factor of major depressive  
44 disorder (MDD), which involves passively dwelling on self-referential dysphoria and  
45 related abstractions. The neurobiology of brooding remains under characterized. We  
46 aimed to elucidate neural dynamics underlying brooding, and explore their responses to  
47 neurofeedback intervention in MDD.

48  
49 **Methods:** We investigated functional MRI (fMRI) dynamic functional network  
50 connectivity (dFNC) in 36 MDD subjects and 26 healthy controls (HCs) during rest and  
51 brooding. Rest was measured before and after fMRI neurofeedback (MDD-active/sham:  
52 n=18/18, HC-active/sham: n=13/13). Baseline brooding severity was recorded using  
53 Ruminative Response Scale - Brooding subscale (RRS-B).

54  
55 **Results:** Four recurrent dFNC states were identified. Measures of time spent were not  
56 significantly different between MDD and HC for any of these states during brooding or  
57 rest. RRS-B scores in MDD showed significant negative correlation with measures of  
58 time spent in dFNC state 3 during brooding ( $r=-0.5$ ,  $p= 1.7E-3$ , FDR-significant). This  
59 state comprises strong connections spanning several brain systems involved in  
60 sensory, attentional and cognitive processing. Time spent in this anti-brooding dFNC  
61 state significantly increased following neurofeedback only in the MDD active group ( $z=-$   
62  $2.09$ ,  $p=0.037$ ).

63

64 **Limitations:** The sample size was small and imbalanced between groups. Brooding  
65 condition was not examined post-neurofeedback.

66

67 **Conclusion:** We identified a densely connected anti-brooding dFNC brain state in  
68 MDD. MDD subjects spent significantly longer time in this state after active  
69 neurofeedback intervention, highlighting neurofeedback's potential for modulating  
70 dysfunctional brain dynamics to treat MDD.

71

## 72 **Keywords**

73 Dynamic functional connectivity, depression, rumination response scale, real-time fMRI  
74 neurofeedback, brooding condition, resting-state

75

## 76 **Introduction**

77 Rumination refers to repeatedly dwelling on negative self-referential thought patterns,  
78 events and experiences (Ehring & Watkins, 2008; Nolen-Hoeksema et al., 2008;  
79 Treynor et al., 2003). This cognitive process has been increasingly recognized as  
80 maladaptive and implicated in the maintenance and exacerbation of major depressive  
81 disorder (MDD) and other mood disorders (Bessette et al., 2020; Ehring & Watkins,  
82 2008; Watkins, 2009a b, 2009b a). It is also considered a crucial element within the  
83 research domain criteria (RDoC) framework (Tozzi et al., 2020). Among its components,  
84 brooding - the passive tendency to dwell on abstract causes and consequences of one's  
85 problems, symptoms and dysphoric mood (Treynor et al., 2003) - stands out for its  
86 strong association with increased risk and sustenance of depression and mood  
87 disorders (Lackner & Fresco, 2016; Treynor et al., 2003; Watkins, 2009a).

88  
89 Emerging functional magnetic resonance imaging (fMRI) literature on the neurobiology  
90 of rumination have broadly implicated aberrations within default-mode network (DMN),  
91 salience network (SN) and central executive network (CEN) (Berman et al., 2011, 2014;  
92 Hamilton et al., 2015; Jacob et al., 2020; Misir et al., 2023; Zhou et al., 2020). These  
93 networks are associated with self-referential and autobiographical thinking (Raichle,  
94 2015), awareness and arousal (Menon & Uddin, 2010), and adaptive cognitive control  
95 (Dosenbach et al., 2007) respectively. A meta-analysis of task-fMRI studies  
96 investigating rumination found convergent increases of activation in dorsal anterior  
97 cingulate cortex (ACC), precuneus, superior temporal gyrus (STG) and other areas,  
98 such that the significant findings maximally overlapped with DMN subsystems that are

99 relevant to repetitive and passive mental dwelling on past events, future scenarios, and  
100 feelings (Zhou et al., 2020). Similarly, a recent systematic review implicated increased  
101 FC of subgenual ACC, posterior cingulate cortex (PCC), medial prefrontal cortex  
102 (mPFC), and amygdala, among other regions in DMN, SN and CEN (Mısır et al., 2023).  
103 However, despite the higher clinical significance of brooding compared to other  
104 rumination subtypes, the neurobiology of brooding remains unclear. Increased brooding  
105 has been associated with varying neurobiological changes across the fMRI literature,  
106 such as reduced FC between amygdala and temporal pole in MDD and healthy samples  
107 (Satyshur et al., 2018), increased FC between PCC and subgenual ACC during rest in  
108 MDD and healthy samples (Berman et al., 2011), reduced variability of DLPFC activity  
109 in MDD (Philippi et al., 2022), increased FC within SN (particularly involving dorsal  
110 ACC) in young girls (Ordaz et al., 2017), increased FC between insula and hippocampal  
111 areas in healthy individuals (X. Li et al., 2022), and FC changes in the triple-network  
112 (i.e., DMN, SN and CEN) in MDD (Pisner et al., 2019). These observations suggest that  
113 brooding is likely supported by excessive self-directed thought, impaired regulation of  
114 negative emotional stimuli and disrupted flexibility to disengage from repetitive negative  
115 thinking and dysphoria.

116  
117 Brain function is largely dynamic and context-dependent (Rabinovich et al., 2012).  
118 Dynamic time-varying FC can illuminate complex time-varying neural interactions  
119 underlying fluctuating cognitive states that are typically missed by static time-averaged  
120 FC estimations (Hutchison et al., 2013). Studies investigating dynamic FC in rumination  
121 and MDD have observed links to disrupted FC dynamics of the DMN, CEN and other

122 networks, suggesting impaired neural communications associated with cognitive control,  
123 flexibility and self-referential processing. High variability (and low stability) of FC  
124 dynamics in DMN regions such as mPFC, hippocampus and PCC (Chen ( 超 ) & Yan  
125 ( 超 ), 2021; Kaiser et al., 2016; Kim et al., 2023; Kucyi & Davis, 2014) was  
126 associated with increased rumination and mind-wandering across MDD and healthy  
127 samples, and dynamic FC of dorsal mPFC was found to strongly predict rumination in  
128 MDD (Kim et al., 2023). Similarly, lower stability and shorter dwelling in dynamic FC  
129 states with positive FC of DMN, sensorimotor areas and subcortical regions have been  
130 associated with MDD pathology (Long et al., 2020; Wu et al., 2019). In contrast, higher  
131 stability and longer dwelling in dynamic FC states with positive FC in DMN and CEN  
132 (Yao et al., 2019) and higher activity in SN, somatomotor and attention networks  
133 (Javaheripour et al., 2023) have also been observed during resting-state in MDD.  
134 Despite the emerging efforts to characterize dissociable dynamic FC states of  
135 rumination and MDD broadly, there is a paucity of literature examining dynamic FC  
136 associated with brooding.

137

138 The goal of this study is to bridge the gap in our understanding of neurobiological  
139 underpinnings of brooding by comparing dynamic FC properties between resting-state  
140 and experimentally induced brooding condition across MDD subjects and healthy  
141 controls (HCs). This approach may also inform the development of interventions that  
142 target the neural dysfunction underlying pathological brooding, like real-time fMRI  
143 neurofeedback (Pindi et al., 2022), where individuals learn to modulate a specific brain

144 function and associated behavior with guidance from real-time feedback of personalized  
145 fMRI brain activity.

146

147 The primary aim of our study was to identify dynamic FC states most relevant to  
148 brooding severity in MDD subjects and HCs. Specifically, we aimed to estimate whole-  
149 brain, time-varying dynamic functional network connectivity (dFNC) states associated  
150 with brooding and resting-state fMRI using a well-validated dynamic FC analysis  
151 technique (Allen et al., 2014; Sendi et al., 2022), and subsequently examine the  
152 association between key temporal indices (like time spent) of the identified dFNC states  
153 and baseline brooding scores (measured using Rumination Response Brooding  
154 subscale (RRS-B)). An additional exploratory aim involved examining the impact of real-  
155 time fMRI neurofeedback on the dynamics of brooding-related dFNC states, thereby  
156 expanding on findings from our previous double-blind, randomized, and sham-  
157 controlled, clinical trial of real-time fMRI neurofeedback and its effects on static FC  
158 associated with brooding (Misaki et al., 2020; Tsuchiyagaito et al., 2021, 2023).

159

160 We hypothesized that: (1) During brooding, compared to HCs, MDD subjects would  
161 show significant decreases in time spent and increases in temporal variability in distinct  
162 dFNC states with strong connections within and between various DMN (e.g., PCC,  
163 mPFC), CEN (e.g., DLPFC), SN (e.g., insula, dorsal ACC), and subcortical (e.g.,  
164 hippocampus, thalamus) regions, building upon prior observations of brooding-related  
165 static FC (Berman et al., 2011; X. Li et al., 2022; Ordaz et al., 2017; Philippi et al., 2022;  
166 Pisner et al., 2019; Satyshur et al., 2018) and rumination-related dynamic FC (Chen



167 (Chen et al., 2021; Kaiser et al., 2016; Kucyi & Davis, 2014) alterations; and  
168 (2) increase in brooding severity would be significantly associated with decrease in time  
169 spent and increased temporal variability in the dFNC states during brooding rather than  
170 resting-state, as experimentally-induced brooding is expected to be more sensitive in  
171 capturing the active cognitive aspect of brooding compared to resting-state (Berman et  
172 al., 2014; Chen et al., 2021; Misaki et al., 2023). Since our clinical trial  
173 did not include a brooding condition after neurofeedback, we performed an exploratory  
174 analysis to identify any changes in the dynamics of brooding-related dFNC states from  
175 pre- to post-neurofeedback resting-state.

176

## 177 **Methods**

178 The study protocol was approved by the Western Institutional Review Board  
179 (IRB#20210286) and registered on ClinicalTrials.gov (NCT04941066). The complete  
180 study details can be found elsewhere (Tsuchiyagaito et al., 2021, 2023).

181

### 182 **Study sample**

183 The recruited subjects comprised 39 individuals with MDD and 28 healthy control  
184 (HC) volunteers. All subjects were aged 18-65 years, fluent in English, and did not  
185 endorse any abnormal neuromorphological brain profiles, pregnancies or  
186 contraindications to MRI.

187 MDD inclusion criteria involved: unipolar MDD categorized by Mini-International  
188 Neuropsychiatric Interview 7.0.2 (MINI) (Sheehan et al., 1998) and Montgomery-Åsberg  
189 Depression Rating Scale (MADRS) scores > 6 (Montgomery & Åsberg, 1979). MDD

190 exclusion criteria included: lifetime history of bipolar disorder, schizophrenia or other  
191 psychotic disorders, DSM-5 criteria for substance abuse or dependence within 6 months  
192 before study screening, active suicidal ideation measured using Columbia-Suicide  
193 Severity Rating Scale (C-SSRS) (Posner et al., 2011), suicide attempts within 12  
194 months before study screening, commencement of psychotropic medication for  
195 depression and/or anxiety less than a month before study screening, or commencement  
196 of psychological therapy less than a month before study screening. HC volunteers had  
197 no prior psychotropic medication use or neuropsychiatric conditions as assessed by  
198 MINI. All participants provided written informed consent and received financial  
199 compensation for their participation.

200

## 201 **MRI scanning**

202 MRI data was acquired on a 3 Tesla MR750 Discovery (GE Healthcare) scanner with 8-  
203 channel receive-only head array coil. Blood-oxygen-level-dependent (BOLD) fMRI data  
204 was acquired using T2\*-weighted gradient echo-planar sequence with sensitivity  
205 encoding (GE-EPI SENSE) which had the following parameters: TR/TE=2000/25ms,  
206 acquisition matrix=96×96, FOV/slice=240/2.9mm, flip angle=90°, voxel size  
207 2.5×2.5×2.9mm<sup>3</sup>; 40 axial slices, SENSE acceleration R=2. The anatomical T1-  
208 weighted (T1w) MRI images were acquired using magnetization-prepared rapid  
209 gradient-echo (MPRAGE) sequence with parameters: FOV=240×192 mm,  
210 matrix=256×256, 124 axial slices, slice thickness=1.2 mm, 0.94×0.94×1.2mm<sup>3</sup> voxel  
211 volume, TR/TE=5/2ms, SENSE acceleration R=2, flip angle=8°. Concurrent

212 physiological signals were recorded using MRI-compatible GE respiration belt and pulse  
213 oximetry sensor.

214

### 215 **FMRI design**

216 The fMRI session included resting-state (6min 50s), experimentally induced brooding  
217 condition (6min 50s), 3 neurofeedback runs with baseline and transfer, and post-  
218 neurofeedback resting-state (6min 50s). During resting-state, subjects were instructed  
219 to clear their mind and not think about anything in particular. Prior to MRI, all subjects  
220 were instructed to specify emotionally salient personal events that triggered brooding  
221 (e.g., experiencing rejection). These events were subsequently used as personalized  
222 cues to elicit brooding in the scanner, with a specific instruction, *‘Why did you react the*  
223 *way you do?’* while subjects viewed a fixation cross. For neurofeedback, subjects were  
224 instructed to implement strategies for regulating brooding, guided by real-time visual  
225 feedback associated with decrease in their FC between PCC and right TPJ. Each of the  
226 MDD and HC groups were further subdivided into an active group (MDD N=18; HC  
227 N=13) receiving contingent and real FC neurofeedback, and a sham group (MDD N=18;  
228 HC N=13) receiving non-contingent and artificially synthesized neurofeedback.

229

### 230 **Brooding score**

231 Here, we examined the relationship between the intensity of brooding, measured using  
232 the ‘brooding’ subscale of the 22-item Ruminative Response Scale (RRS-B) (Nolen-  
233 Hoeksema & Morrow, 1991; Treynor et al., 2003), and dynamic FNC. With a 4-point

234 Likert scale, RRS-B evaluates one's tendency to passively dwell on causes and  
235 consequences of depressive events/mood (e.g., *think 'why can't I handle things better'*).

236

### 237 **MRI preprocessing**

238 Data was converted to BIDS format and preprocessed using fMRIPrep 23.1.3.

239 T1-weighted (T1w) anatomical images were corrected for intensity non-uniformity, and

240 skull-stripped using Advanced Normalization Tools (ANTs) (Avants et al., 2009). Brain

241 tissue segmentation of cerebrospinal fluid (CSF), white matter (WM) and gray matter

242 (GM) was performed on the brain-extracted T1w using FSL FAST (Smith et al., 2004;

243 Zhang et al., 2001). Finally, volume-based spatial normalization of the brain-extracted

244 T1w images to standard space (MNI152NLin2009cAsym) was performed through

245 nonlinear registration using ANTs.

246 Prior to preprocessing fMRI BOLD data, its first 5 volumes were discarded to

247 allow for equilibration of the magnetic fields, resulting in 200 volumes per run per

248 subject. Subsequently for each run and subject, the following preprocessing steps were

249 performed in fMRIPrep (Esteban et al., 2019). Reference volume and skull-stripped

250 versions of the BOLD data were generated. The BOLD reference was co-registered to

251 the T1w reference using boundary-based registration with six degrees of freedom in

252 FreeSurfer (Greve & Fischl, 2009). Head-motion parameters with respect to the BOLD

253 reference (transformation matrices, and six rotation and translation parameters) were

254 estimated prior to spatiotemporal filtering. Fieldmap-less B0 inhomogeneity distortion

255 correction was performed by fMRIPrep, and slice-timing correction was performed using

256 AFNI (Cox & Hyde, 1997). All resamplings were performed with a single interpolation

257 step to derive the fully preprocessed spatially normalized BOLD data. Spatial smoothing  
258 was performed on the pre-processed data using a gaussian kernel size of 6 mm full-  
259 width half-maximum with FSL. Denoising with nuisance regression was performed  
260 separately on the outputs of ICA prior to estimation of dFNC. Physiological nuisance  
261 predictors (8 respiration, 6 cardiac, 4 respiration x cardiac, 1 heart rate (Chang et al.,  
262 2009), 1 respiratory volume (Harrison et al., 2021)) were estimated with  
263 RETROspective Image CORrection (RETROICOR) (Glover et al., 2000) within the  
264 PhysIO toolbox (Kasper et al., 2017) using the respiration and cardiac data measured  
265 during fMRI.

266 Subjects whose mean framewise displacement (mean FD; estimated in  
267 fMRIPrep) exceeded a threshold of 0.3 mm were excluded (3 MDD subjects and 2 HCs)  
268 due to excessive head motion, thereby leading to a final sample of 36 MDD subjects  
269 and 26 HCs.

270

## 271 **Independent Component Analysis (ICA)**

272 Following standard recommendations (Allen et al., 2014) in GIFT toolbox v4.0.4.10  
273 (<https://trendscenter.org/software/gift/>), the preprocessed BOLD data was combined  
274 across all subjects (from MDD and HC groups) and runs, decomposed into functional  
275 networks using group-level spatial ICA, and denoised. Specifically, after intensity  
276 normalization of the preprocessed data, dimensionality reduction was initiated via  
277 subject-level principal components analysis (PCA) (130 PCs). Subsequently, group-  
278 level PCA (across all runs and subjects) using expectation-maximization (EM) algorithm  
279 (Roweis, 1997) retained 100 PCs. The Infomax ICA algorithm (Bell & Sejnowski, 1995)

280 was repeated 15 times in ICASSO (<http://www.cis.hut.fi/projects/ica/icasso/>) to estimate  
281 100 reliable group ICs. Subject-specific ICs were derived from the group ICs using  
282 GICA1 back-reconstruction (Calhoun et al., 2001; Erhardt et al., 2011). Following  
283 established guidelines for IC classification (Griffanti et al., 2017), two raters (SG and  
284 AT) independently classified the 100 group ICs into signal and artifactual (e.g.,  
285 physiological, movement, imaging artifacts) ICs based on spatial, temporal and spectral  
286 characteristics. Final consensus between raters enabled identification of 34 signal ICs  
287 (Figure 2) as functional networks showing peak activations in known cortical and sub-  
288 cortical regions, minimal spatial overlap with known vascular, ventricular, motion, and  
289 susceptibility artifacts, and predominantly low-frequency time-courses (Allen et al.,  
290 2011; Cordes et al., 2000).

291 All subject-level signal ICs were temporally denoised by low-pass filtering (0.15  
292 Hz cutoff), motion outlier de-spiking (replacing outliers via third-order spline  
293 interpolation) (Allen et al., 2014), detrending linear, quadratic and cubic trends, and  
294 multiple regression using 20 RETROICOR physiological and 12 fMRIPrep head motion  
295 (6 rotation+translation & derivatives) regressors.

296

## 297 **DFNC estimation**

298 DFNC was estimated with standard settings in the temporal dFNC toolbox (Allen et al.,  
299 2014) packaged within GIFT. Specifically, sliding window covariance (window  
300 length=22TRs(44s), Gaussian taper  $\sigma=3$ TRs, step length=1TR) was computed across  
301 the 34 denoised IC timecourses, resulting in 178 concatenated sequential FNC windows  
302 per run per subject. Covariance was computed from sparse L1-regularized precision

303 matrices (Smith et al., 2011; Varoquaux et al., 2010) using a graphical LASSO  
304 approach (Friedman et al., 2008), wherein the regularization parameter lambda ( $\lambda$ ) was  
305 optimized via within-run cross-validation framework. The dFNC estimates were  
306 controlled for subject-level covariates including age, sex and mean FD, and Fisher  
307 transformed resulting in normalized correlation matrices (34x34) that varied across time  
308 for each run per subject.

309 To investigate the dynamics of recurring FNC states, k-means clustering (Lloyd,  
310 1982) (with Manhattan distance) was performed on the windowed correlation matrices.  
311 Initial clustering with randomized centroid initializations was performed 500 times on  
312 subsampled data (subject exemplars (Pascual-Marqui et al., 1995)) to avoid local  
313 minima while minimizing computational burden. The resulting centroids (cluster  
314 medians) were then used to initialize clustering of all data (62subjects x 3runs x  
315 178windows=33,108matrices). The optimal number of clusters was determined as four  
316 (k=4) using the elbow criterion of the cluster validity index (within-cluster distance |  
317 between-cluster distance).

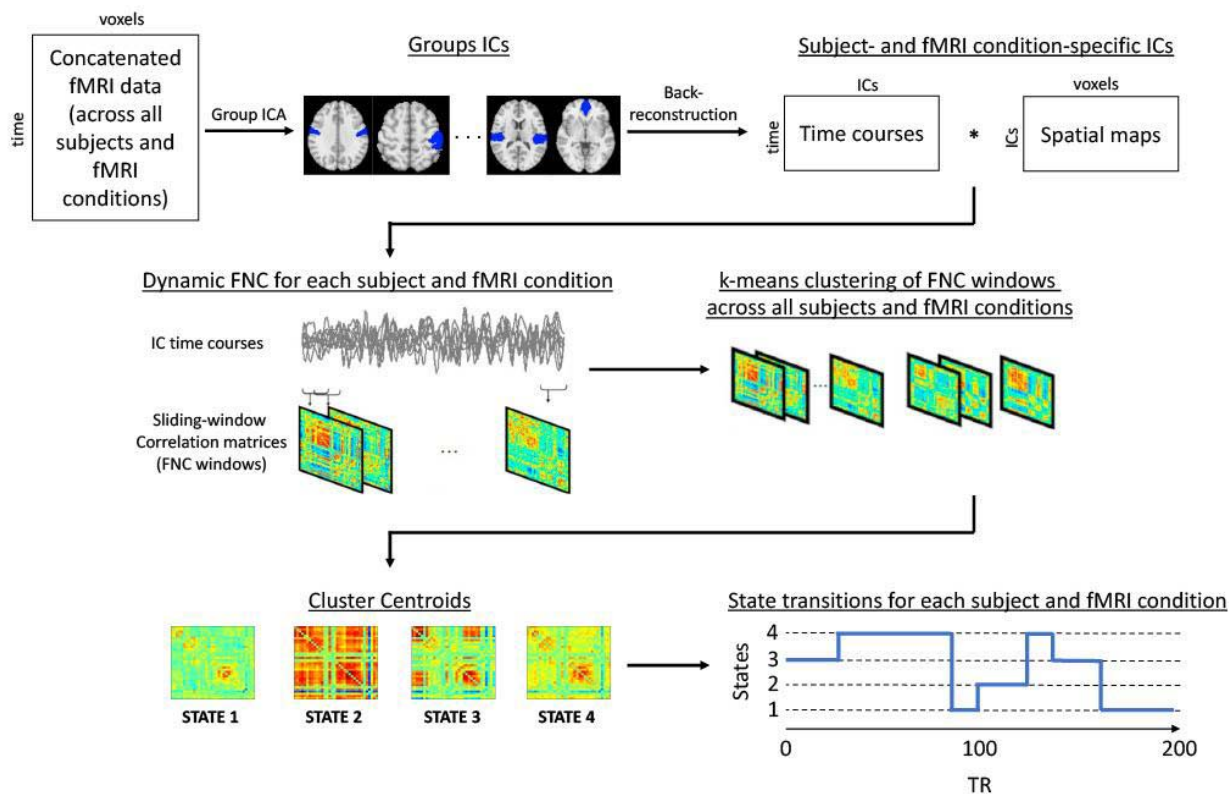

318  
 319 *Figure 1: Graphical illustration of the dynamic Functional Network Connectivity (dFNC)*  
 320 *method used in the study. Group Independent Component Analysis (ICA) is performed*  
 321 *on concatenated data and subsequent back-reconstruction produces subject-specific*  
 322 *and fMRI condition-specific independent components (ICs). Sliding-window correlation*  
 323 *is performed across the timecourses of these ICs, to extract FNC matrices that are then*  
 324 *clustered to produce group-level centroid states. Finally, the state transitions are*  
 325 *estimated for each subject and fMRI condition, which are used to compute mean dwell*  
 326 *time and fraction of time associated with each centroid state.*



327

## 328 **Outcomes**

329 Based on the dFNC state transitions of each fMRI condition and subject (Figure 1),  
330 dwell time and fraction of time were calculated for each of the four dFNC states. Dwell  
331 time refers to the average number of consecutive FNC windows occupied by a given  
332 dFNC state. Fraction of time represents the proportion of total time spent in a given  
333 dFNC state. The dwell time and fraction of time of each dFNC state were compared  
334 between MDD and HC during the baseline resting-state and the brooding condition  
335 using independent non-parametric Wilcoxon rank sum tests. Subsequently, the  
336 association between these outcomes (dwell time, fraction of time) and brooding (RRS-B  
337 scores) were examined using non-parametric Spearman correlation for each dFNC  
338 state during the baseline resting-state and brooding condition, within the MDD and HC  
339 groups separately. FDR correction ( $p < 0.05$ ) was used to control for the multiple  
340 comparisons. Note that not all subjects visit every dFNC state during an fMRI run.  
341 Therefore, we also conducted a chi-squared test of proportions to examine if there were  
342 any significant differences between MDD and HC in the proportion of subjects entering  
343 each dFNC state, during resting-state and brooding condition.

344

345 As a secondary analysis, non-parametric Wilcoxon signed rank tests were  
346 conducted to explore the difference between time spent (i.e., dwell and fraction) in RRS-  
347 B related dFNC state/(s) during baseline resting-state and post-neurofeedback resting-  
348 state within each neurofeedback subgroup. This was to examine if and whether time

349 spent in the dFNC state/(s) related to brooding was affected by the neurofeedback  
350 training.

351

## 352 Results

353 The final sample included HC (N=26) and MDD (N=36) groups each subdivided into  
354 active and sham neurofeedback subgroups. Table 1 lists the sample size, age, sex and  
355 RRS-B scores in each subgroup.

356

357

358 *Table 1: Age, sex, sample size and baseline RRS-B scores in MDD active, MDD sham, HC*  
359 *active and HC sham groups.*

| Sample type | Sample size (N) | Age in years (mean $\pm$ s.d) | Females/Males | RRS-B scores (mean $\pm$ s.d) |
|-------------|-----------------|-------------------------------|---------------|-------------------------------|
| MDD active  | 18              | 32.2 $\pm$ 10.1               | 12/6          | 12.9 $\pm$ 3.2                |
| MDD sham    | 18              | 32.4 $\pm$ 10.9               | 14/4          | 12.5 $\pm$ 3.2                |
| HC active   | 13              | 23.2 $\pm$ 4.3                | 9/4           | 6 $\pm$ 1.2                   |
| HC sham     | 13              | 22.3 $\pm$ 3.7                | 11/2          | 6.4 $\pm$ 1.1                 |

360

361

362

## 363 Functional networks from ICA

364 A total of 34 functional networks (ICs) were identified from the group ICA analysis.  
365 These networks were labeled and grouped into six domains based on standard  
366 taxonomy (Uddin et al., 2019), and established network (Yeo et al., 2011) and  
367 subcortical (Tian et al., 2020) parcellations. The domains include default-mode, central  
368 executive, salience, attention, somatomotor, and visual. Two cortical networks and the  
369 five subcortical networks did not fit into a single domain. Figure 2 shows the spatial  
370 brain maps and labels of all the functional networks identified using ICA, grouped within  
371 their respective domains.

372

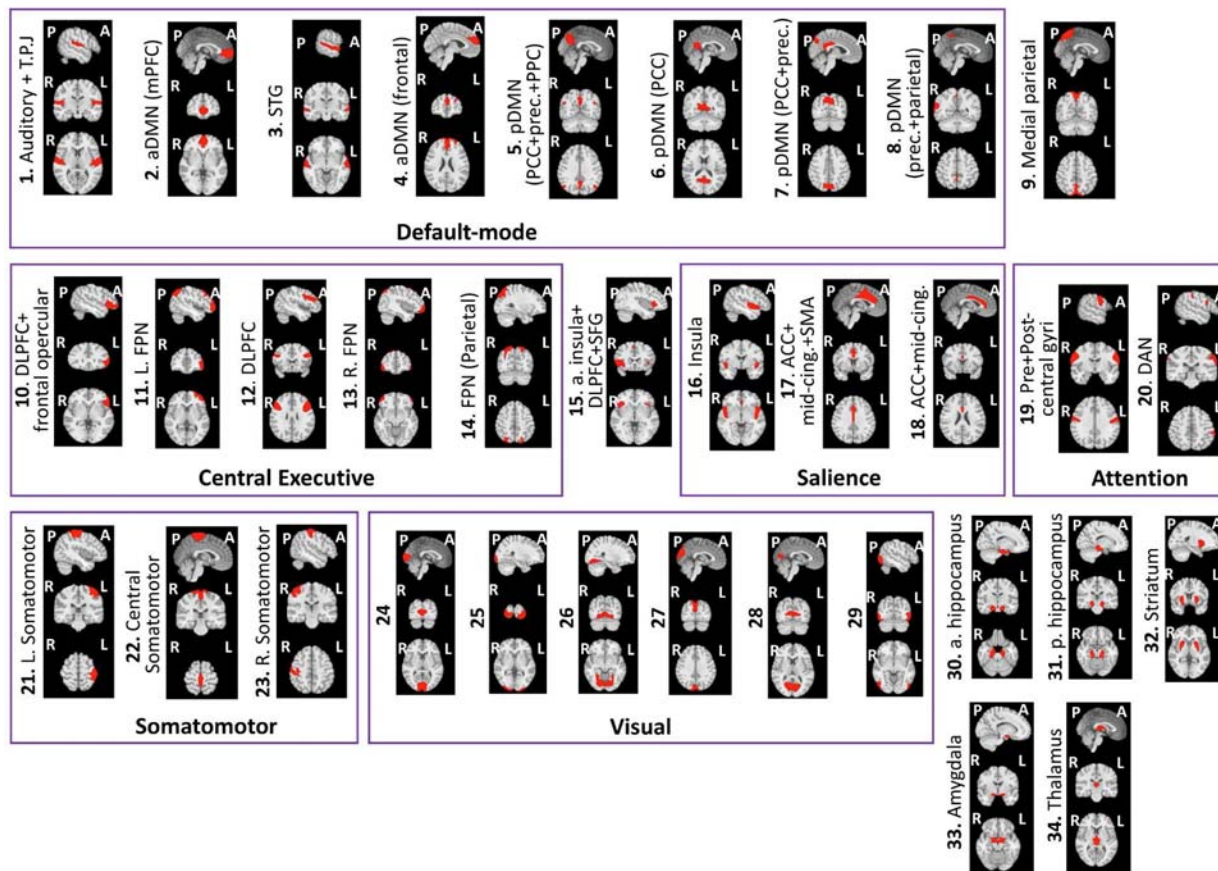

373

374 *Figure 2: Spatial maps of the 34 functional networks extracted from group ICA, overlaid*  
375 *on discrete anatomical brain slices. Where applicable, the networks are labeled and*  
376 *grouped within rectangles into their respective domains of functional affiliation. Note that*  
377 *functional networks 24-29 indicate different visual subnetworks. A – anterior, P –*  
378 *posterior, R – Right, L – Left; T.P.J - Temporoparietal junction, aDMN - anterior default-*  
379 *mode network, pDMN - posterior default-mode network, mPFC - medial prefrontal*  
380 *cortex, STG - superior temporal gyrus, prec. - precuneus, PCC - posterior cingulate*  
381 *cortex, PPC - posterior parietal cortex, DLPFC - dorsolateral prefrontal cortex, FPN -*  
382 *frontoparietal network, SFG - superior frontal gyrus, ACC - anterior cingulate cortex,*  
383 *mid-cing. - mid-cingulate cortex, SMA - supplementary motor area, DAN - dorsal*  
384 *attention network, a. hippocampus - anterior hippocampus, p. hippocampus - posterior*  
385 *hippocampus.*

386

### 387 **Dynamic functional network connectivity (dFNC) states**

388 Clustering of the time-varying FNC states formed by the 34 functional networks  
389 produced four centroid dFNC states, as shown in Figure 3.

390

391

392

393

394

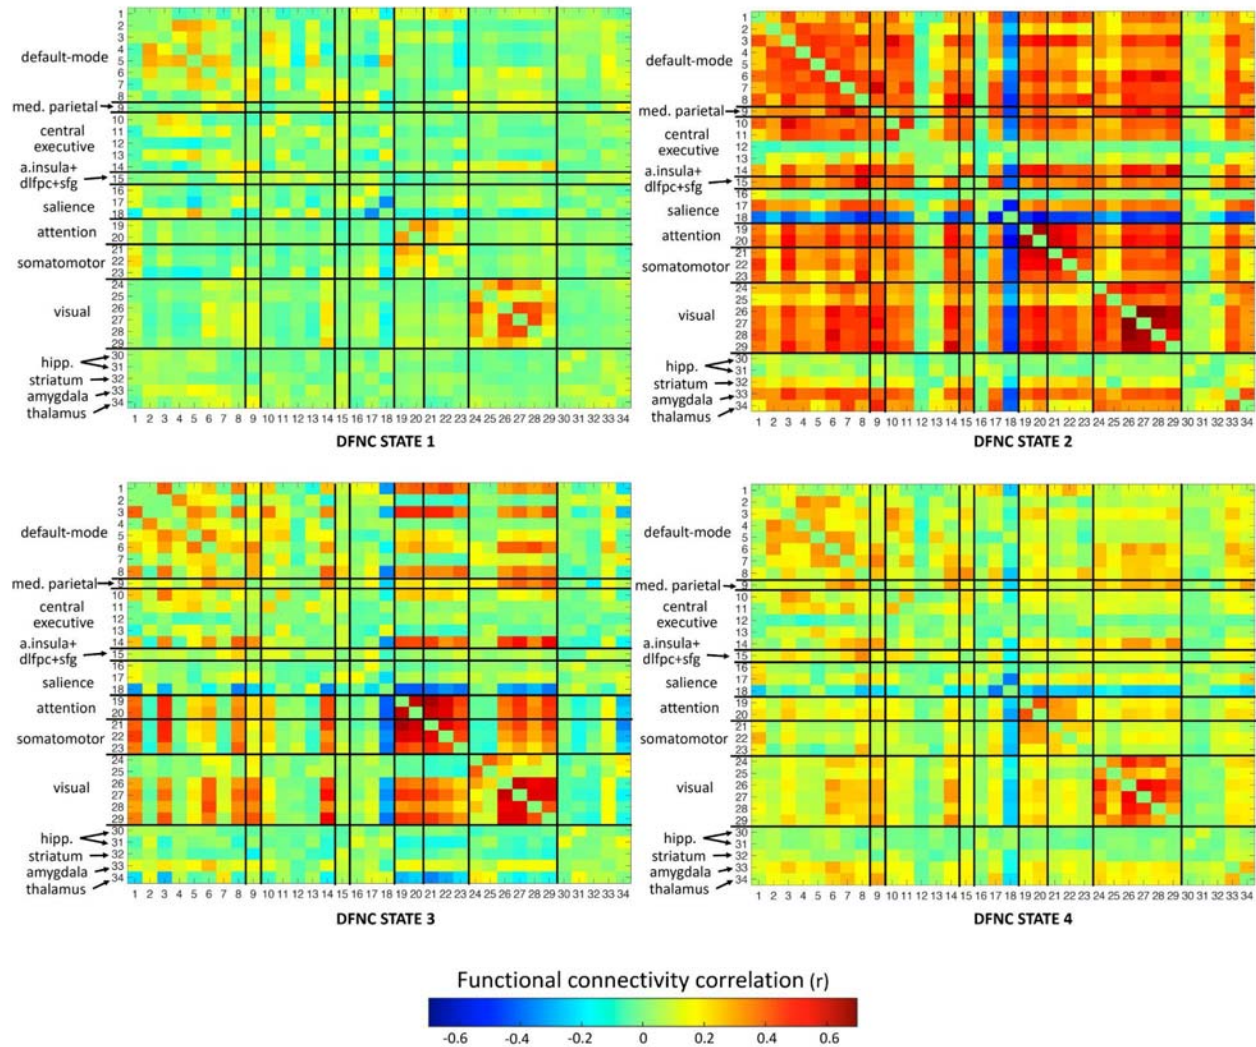

395  
 396 *Figure 3: Graphical representation of the four recurring centroid dFNC states extracted*  
 397 *from dFNC analysis. The matrices are symmetric, and the black lines within each matrix*  
 398 *indicate boundaries of functional network domains (as displayed in Figure 2). The value*  
 399 *of functional connectivity correlation between any two IC networks determines the color*  
 400 *(‘hot’ color gradient) of the corresponding matrix entry. med. - medial, a. insula - anterior*  
 401 *insula, dlpfc - dorsolateral prefrontal cortex, sfg - superior frontal gyrus, hipp. -*  
 402 *hippocampus.*

403  
 404  
 405

406  
407 DFNC state 1 is a sparsely connected state, marked by moderate positive FC within  
408 default-mode (between anterior and posterior default-mode networks), and dorsal  
409 attention networks, strong positive FC within visual networks, and strong negative FC  
410 within anterior and mid-cingulate salience networks. DFNC state 2 is a hyperconnected  
411 state, with strong positive FC within and between most networks throughout the brain,  
412 and strong negative FC between the anterior and mid-cingulate salience network and  
413 the whole brain. The hippocampi, striatum and some central executive subnetworks  
414 however show weak FC with the whole brain.

415  
416 DFNC state 3 is a densely connected integrated state, comprising strong positive FC  
417 within attention, somatomotor and visual networks, moderate-to-strong positive FC  
418 within default-mode networks, and strong positive FC between attention, somatomotor,  
419 default-mode (superior temporal gyrus (STG) and temporoparietal junction (TPJ)) and  
420 visual networks. Posterior default-mode networks (posterior cingulate cortex (PCC) and  
421 precuneus) show strong positive FC with visual networks. The thalamus shows strong  
422 negative FC with attention, somatomotor and default-mode networks (TPJ and STG).  
423 The anterior and mid-cingulate salience network shows strong negative FC with  
424 somatomotor, attention, visual, central executive parietal, medial parietal, and default-  
425 mode networks (TPJ, STG and precuneus). Subnetworks from CEN (DLPFC, parietal  
426 CEN) have moderate-to-strong positive FC with attention, visual, somatomotor and  
427 default-mode networks.

428

429 DFNC state 4 is characterized by strong positive FC within visual and attention  
430 networks, moderate-to-strong positive FC within default-mode networks, scattered  
431 moderate positive FC of default-mode with visual, central executive with default-mode,  
432 attention with somatomotor, amygdala and thalamus with default-mode, and parietal  
433 with visual and default-mode networks, and moderate-to-strong negative FC between  
434 anterior/mid-cingulate network and the whole brain.

435

### 436 **Differences in time spent in dFNC states between groups**

437 There were no significant differences in the time spent (dwell time or fraction of time) in  
438 any dFNC state between MDD and HC groups during baseline brooding condition or  
439 resting-state. Mean values of dwell time and fraction of time for each condition, group  
440 and dFNC state can be found in Supplementary Table 1. Additionally, the proportion of  
441 subjects entering each dFNC state was not significantly different between MDD and HC  
442 groups during resting-state or brooding. The proportions of subjects per dFNC state for  
443 each group and condition are shown in Supplementary Table 2.

444

### 445 **Association between time spent in dFNC states and RRS-B scores**

446 The dwell time and fraction of time spent in dFNC state 3 showed strong negative  
447 correlation with RRS-B scores in the MDD group during the brooding condition. These  
448 were the only associations that remained significant after FDR correction across all  
449 correlation analyses (dwell time:  $r(34)=-0.5$ ,  $p\text{-FDR}=0.031$ ; fraction of time:  $r(34)=-0.5$ ,  
450  $p\text{-FDR}=0.031$ ) (Figure 4a, 4b). The correlations were non-significant for MDD in resting-  
451 state (Figure 4e, 4f) and for the HC group (Figure 4c, 4d, 4g, 4h). Illustrations of the

452 correlations for the other dFNC states are shown in Supplementary Figures SF1, SF2  
453 and SF3. None of these survived FDR correction.

454

455

456

457

458

459

460



Brooding condition in MDD

Brooding condition in HC

**a.**

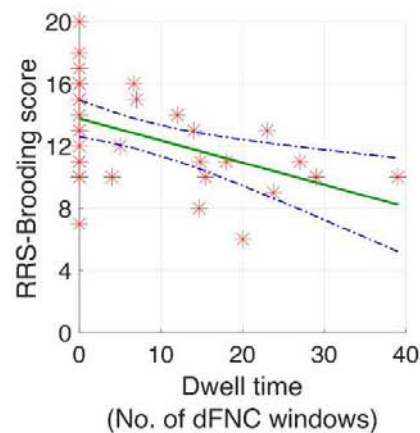

$r(34) = -0.5, p = 0.0017,$   
**FDR  $p = 0.031$**

**b.**

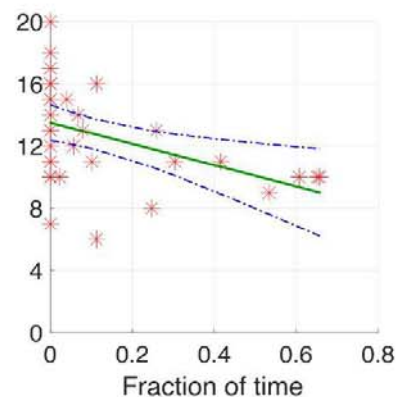

$r(34) = -0.5, p = 0.0019,$   
**FDR  $p = 0.031$**

**c.**

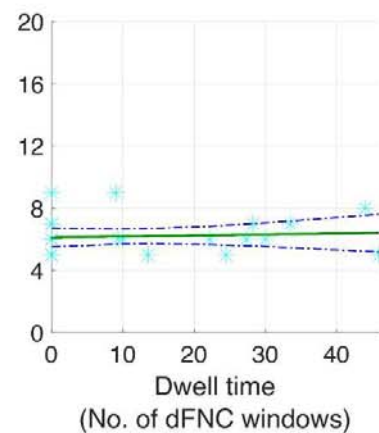

$r(24) = 0.10, p = 0.61$

**d.**

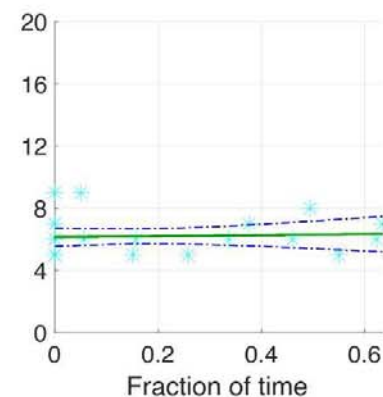

$r(24) = 0.12, p = 0.55$

Resting-state in MDD

Resting-state in HC

**e.**

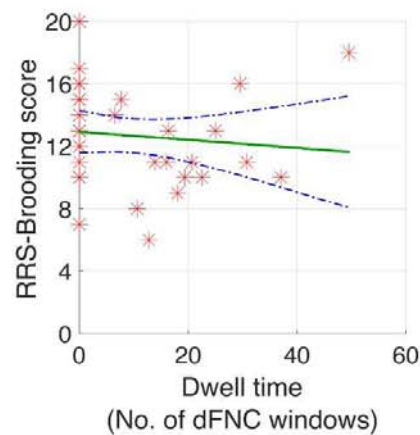

$r(34) = -0.25, p = 0.14$

**f.**

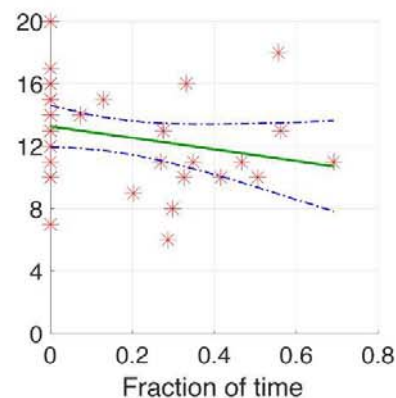

$r(34) = -0.28, p = 0.09$

**g.**

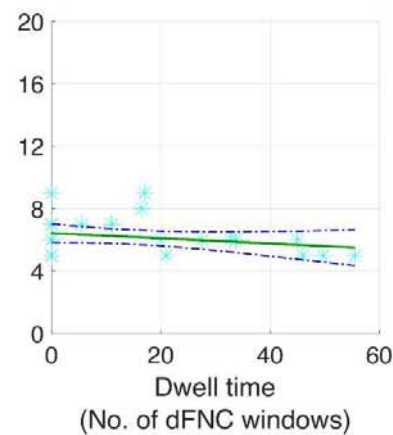

$r(24) = -0.20, p = 0.31$

**h.**

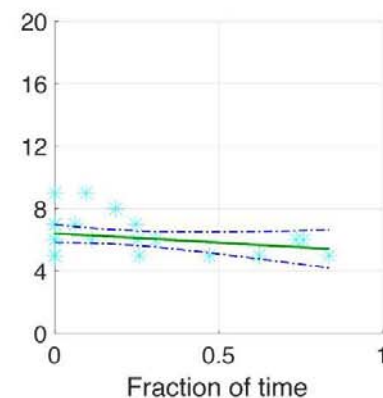

$r(24) = -0.17, p = 0.39$

462 *Figure 4: Scatter plots showing associations between brooding severity (RRS-B scores) and outcomes of dFNC state 3 in*  
463 *MDD group during brooding condition (dwell time in (a) and fraction of time in (b)), HC group during brooding condition*  
464 *(dwell time in (c) and fraction of time in (d)), MDD group during resting-state (dwell time in (e) and fraction of time in (f)),*  
465 *and HC group during resting-state (dwell time in (c) and fraction of time in (d)). In each scatter plot, the RRS-B scores are*  
466 *depicted in the y-axis while the outcome of dFNC state 3 is shown in the x-axis. The green line represents the linear fit of*  
467 *the association between RRS-B scores and the dFNC outcome, while the blue dotted curved lines represent the 95%*  
468 *confidence interval of the linear fit. The only associations significant after FDR correction for multiple comparisons were*  
469 *observed in the MDD group during the brooding condition ((a) and (b)). RRS-B - Rumination Response Scale - Brooding*  
470 *subscale*

471

472 **Differences in time spent in dFNC state 3 between pre-neurofeedback and post-**  
473 **neurofeedback resting-state**

474 Neurofeedback training related changes in dwell time and fraction of time spent in the  
475 brooding-associated dFNC state 3 in MDD active, MDD sham, HC active and HC sham  
476 subgroups were explored through paired t-tests (Figure 5). The fraction of time spent in  
477 dFNC state 3 showed a significant increase from pre-neurofeedback resting-state to  
478 post-neurofeedback resting state in the MDD active neurofeedback group only (Figure  
479 5e;  $z=-2.09$ ,  $p=0.037$ ). Changes in dFNC state 3 measures were non-significant (Figure  
480 5) for all other neurofeedback subgroups (i.e., HC active, HC sham and MDD sham).

481

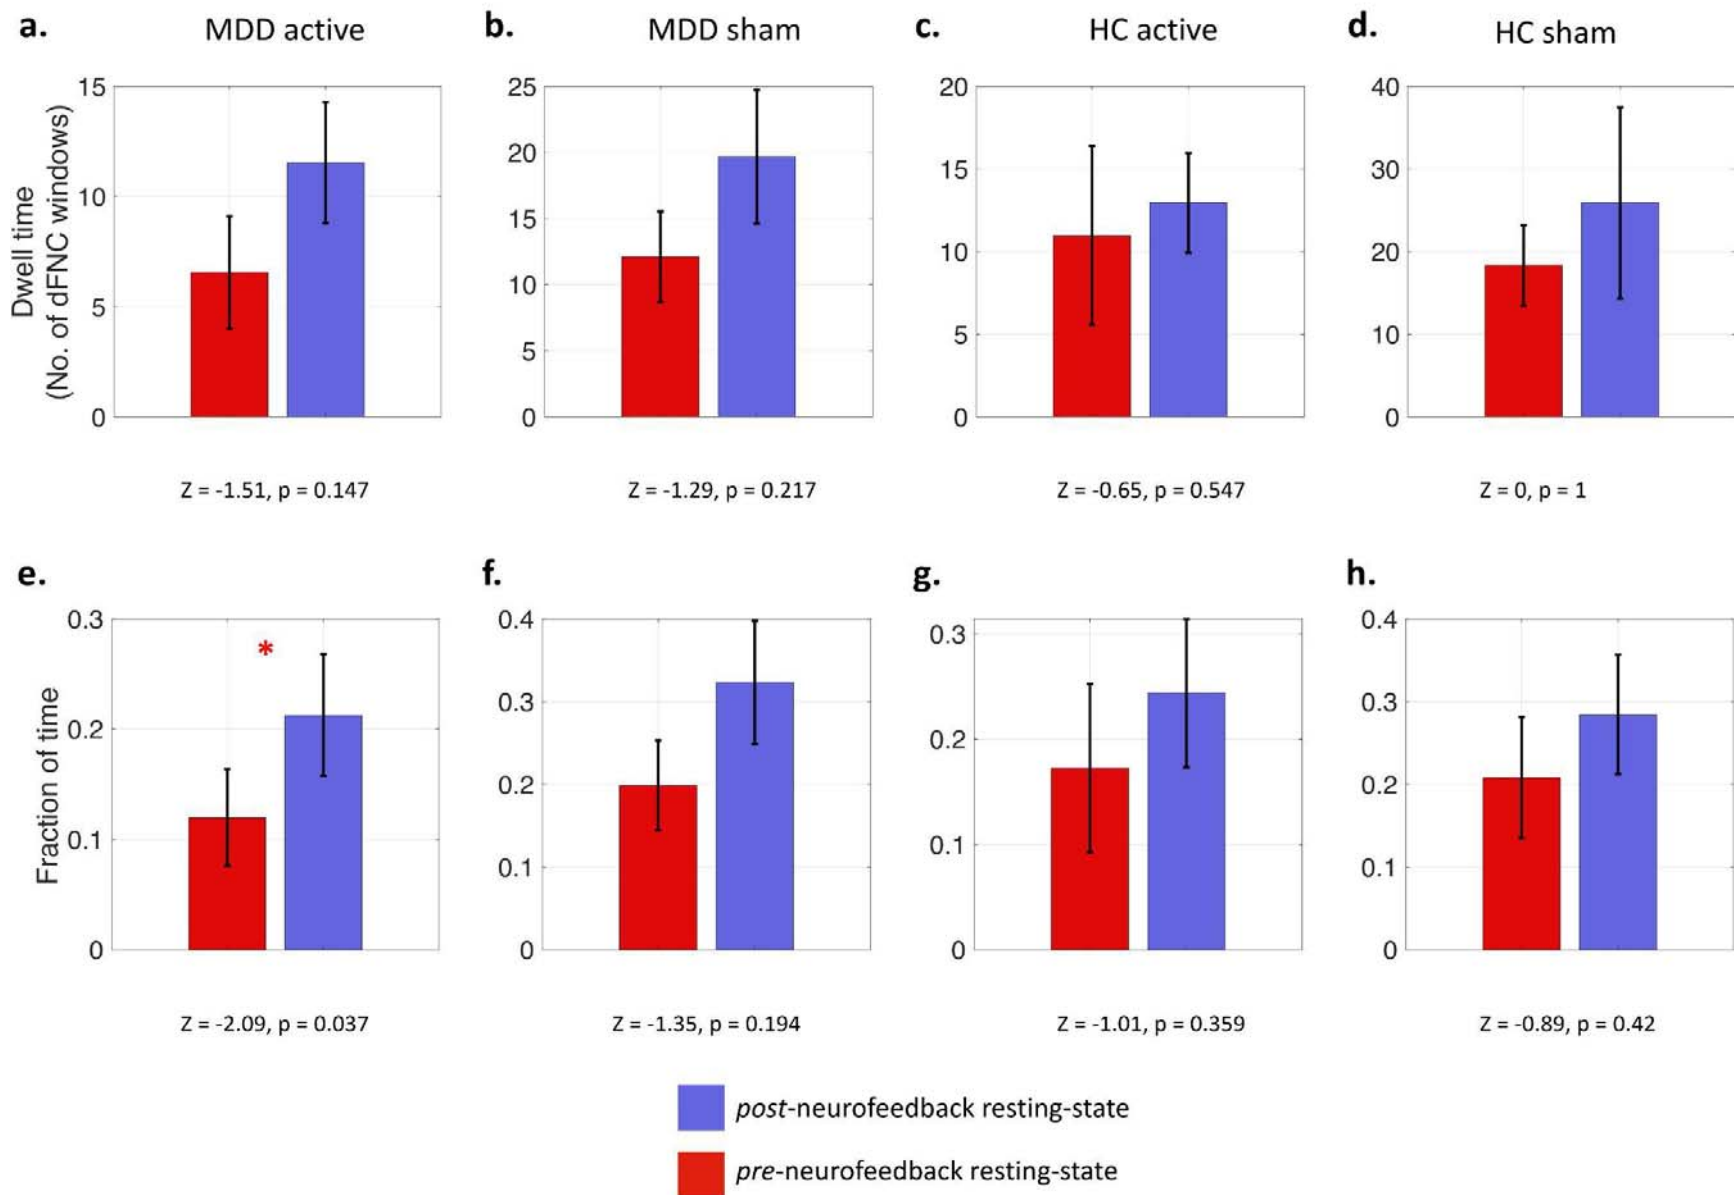

483 *Figure 5: Bar graphs, with corresponding p values and z-score approximations, representing mean changes in the*  
484 *outcomes of **dFNC state 3** from pre- to post-neurofeedback resting-state in the MDD active neurofeedback ((a) and (e)),*  
485 *MDD sham neurofeedback ((b) and (f)), HC active neurofeedback ((c) and (g)), and HC sham neurofeedback ((d) and (h))*  
486 *subgroups. The top four graphs ((a)-(d)) represent changes in dwell time of dFNC state 3 (y-axis), while the bottom four*  
487 *graphs ((e)-(h)) represent changes in fraction of time of dFNC state 3 (y-axis). The bars represent mean values and the*  
488 *black lines on each bar represents standard error about the mean. The only significant change (indicated by red asterisk)*  
489 *was found in the MDD active neurofeedback group (e), where the fraction of time spent in dFNC state 3 increased after*  
490 *neurofeedback. This significance however did not survive correction for multiple comparisons.*

491  
492

## 493 **Discussion**

494 We examined whole-brain time-varying dynamic functional network connectivity (dFNC)  
495 associated with resting-state and brooding fMRI in depressed and healthy individuals to  
496 illuminate brain states associated with brooding severity, a critical symptom of  
497 depression measured using RRS-B scores. We identified four group-level summary  
498 dFNC states that were inhabited for varying durations by each individual in each fMRI  
499 condition. The first hypothesis, positing that the time spent in the identified dFNC states  
500 would differ between MDD and HC during resting-state and brooding conditions, was  
501 not supported. Time spent in these states was not significantly different between MDD  
502 and HC in resting-state or the brooding condition, suggesting that the presence and  
503 maintenance of these states are not uniquely altered in MDD at a detectable level with  
504 the current sample size. However, our second hypothesis was supported: greater  
505 brooding severity was significantly associated (FDR-corrected  $p < 0.05$ ) with lesser time  
506 spent (i.e., proportion of time and dwell time) in the densely connected dFNC state 3,  
507 which is primarily characterized by moderate-to-strong positive FC within and between  
508 default-mode, attention, somatomotor, and visual networks, between central-executive  
509 and default-mode regions, and strong negative FC of ACC and thalamus with  
510 aforementioned networks. Notably, this relationship was significant only in the MDD  
511 group during the brooding condition, highlighting the utility of mood induction paradigms  
512 in capturing neurobiological effects sensitive to brooding and rumination in MDD.

513

514 Secondary analysis further revealed that our real-time fMRI neurofeedback trial was  
515 associated with significant increase (uncorrected  $p=0.037$ ) in the proportion of time  
516 spent in the anti-brooding dFNC state 3. The increase from pre-to-post neurofeedback  
517 resting-state was significant only in the MDD active neurofeedback group. Such  
518 preliminary evidence suggests that neurofeedback may mitigate brooding in MDD  
519 beyond sham neurofeedback by modifying brooding-related FC dynamics, in addition to  
520 time-averaged FC as previously demonstrated (Tsuchiyagaito et al., 2023).

521

### 522 **Dynamic FC associated with brooding in depression**

523 Consistent with our hypothesis, brooding was associated with time spent in a densely  
524 connected dFNC state 3 containing unique FC patterns involving DMN, SN (ACC), CEN  
525 (parietal areas) and subcortical areas (thalamus). We also found prominent involvement  
526 by additional networks, namely dorsal attention, somatomotor and visual. DFNC state 3  
527 is an integrated densely connected state comprising moderate-to-strong FC primarily  
528 within and between default-mode, attention, somatomotor and visual networks. The  
529 temporal dynamics of these connections are particularly relevant to MDD. MDD has  
530 been associated with more time spent having reduced FC within somatomotor and  
531 dorsal attention networks (Javaheripour et al., 2023), less time in integrated states with  
532 increased FC between sensory and default-mode networks (Wu et al., 2019), and more  
533 time with reduced FC within and between visual, auditory, somatomotor and default-  
534 mode networks (Xu et al., 2022). Similarly, recent mega- and meta-analytic evidence of  
535 prominent static FC alterations in MDD implicated hypoconnectivity within and between  
536 dorsal attention, somatomotor, parietal and visual networks (Javaheripour et al., 2021;

537 Tse et al., 2023). This is consistent with our observation of increased MDD brooding  
538 severity with decrease in time spent having hyperconnectivity in these same networks.  
539 Importantly, as shown in Figure 4, several MDD individuals with high brooding severity  
540 did not even visit the densely connected dFNC state 3 (i.e., fraction of time = 0).

541

542 Higher interconnectedness of the default-mode network with the attention, somatomotor  
543 and visual networks, as observed in dFNC state 3, may facilitate improved integration of  
544 ongoing self-referential processing with present-moment environmental, sensory and  
545 bodily experiences. Such improved integration can potentially enable frequent  
546 interruptions to passive brooding in MDD through attention to present-moment stimuli  
547 triggering mood change. DFNC state 3 additionally includes strong negative FC  
548 involving mid-cingulate cortex, ACC and thalamus. Mid- and anterior cingulate cortices  
549 are generally implicated in emotion and cognitive regulation (Stevens et al., 2011), while  
550 thalamus is involved in brain-wide, multimodal sensory processing, arousal and  
551 perception (Hwang et al., 2017; Shine et al., 2023). These areas are particularly  
552 dysfunctional in MDD, brooding and rumination (Berman et al., 2011; Chen ( 超 ) &  
553 Yan ( 超 ), 2021; Long et al., 2020; Yao et al., 2019). Therefore, their strong  
554 anticorrelation with auditory default-mode (TPJ, STG), somatomotor, attention and  
555 visual networks in dFNC state 3 suggests that more time in this state may promote  
556 adaptive emotional and cognitive processing, facilitated by increased integration of  
557 somatosensory and external perceptual updates into self-related thinking. Additionally,  
558 such adaptive processing is likely facilitated by the state's moderate-to-strong positive



559 FC between CEN and DMN regions, which may promote cognitive disengagement from  
560 brooding in MDD (Y. Li et al., 2021; Pisner et al., 2019).

561

562 On the contrary, shorter fraction of time and dwell time (i.e., time spent continuously in a  
563 state before transitioning to another state) in dFNC state 3 or not visiting the state at all  
564 likely minimize these adaptive processes, exacerbating brooding and MDD. This effect  
565 is consistent with several dynamic FC studies that found increases in rumination with  
566 higher temporal variability of FC in several areas and networks, including DMN, visual  
567 network, somatosensory network, temporal areas, mPFC, ACC, dorsal attention  
568 network, inferior parietal lobe (IPL), TPJ and superior parietal lobe (SPL) (Chen ( 超 ) &  
569 Yan ( 超 ), 2021; Kim et al., 2023; Kucyi & Davis, 2014). Particularly, these areas  
570 also form prominent FC patterns in dFNC state 3, whose shorter dwell time (or higher  
571 temporal variability) is related to increased brooding severity here, illustrating some of  
572 the shared neural dynamics underpinning rumination and its MDD-sensitive component  
573 - brooding. Shorter dwell times in strongly connected states similar to dFNC state 3  
574 have also been associated with suicide risk and ideation (Xu et al., 2022).

575

576 Dynamic time-varying FC is a promising avenue to elucidate intricate time-sensitive  
577 neuronal mechanisms underlying various states of cognition, disease and  
578 consciousness, with greater potential to characterize psychiatric biomarkers compared  
579 to traditional static FC alone (Calhoun et al., 2008, 2014; Cohen, 2018; Ganesan et al.,  
580 2022; Hutchison et al., 2013). Notably, dynamic FC can outperform static FC in  
581 predicting individual differences in rumination using diverse clinical and subclinical

582 datasets (Kim et al., 2023). Our present work demonstrates the utility of dynamic FC in  
583 characterizing the time-varying behavior of a whole-brain FC state associated with  
584 brooding, a critical symptom and prognostic factor of MDD. In addition to unique FC  
585 patterns comprising DMN, CEN, SN and subcortical networks, we found prominent  
586 involvement by somatomotor, attention and visual networks in brooding-related FC  
587 dynamics.

588

### 589 **Effect of real-time neurofeedback on brooding-related dynamic FC in depression**

590 Our secondary analysis also highlighted the sensitivity of dynamic FC in capturing  
591 intervention effects associated with real-time fMRI neurofeedback. Specifically, following  
592 real-time neurofeedback training aimed at attenuating brooding, MDD subjects were  
593 able to spend significantly more time in dFNC state 3 during rest, suggesting diminished  
594 brooding. Importantly, this effect was non-significant in the sham neurofeedback MDD  
595 group that received artificially synthesized feedback signals, and in the HC subgroups.  
596 This suggests a neurobiologically adaptive response to the neurofeedback training in  
597 MDD, indicating reduced difficulty in sustaining the protective dFNC state 3 and  
598 facilitating a move away from passive dwelling on maladaptive thought patterns. This is  
599 also consistent with previous findings (Tsuchiyagaito et al., 2023) which showed that  
600 only the MDD active neurofeedback, and not MDD sham neurofeedback, subgroup  
601 experienced significant reduction in brooding severity measured one week after  
602 neurofeedback. Overall, the current work highlights the utility of time-varying FC in  
603 examining neurofeedback-related outcomes to capture effects that may be missed by  
604 traditional static FC approaches.

605

## 606 **Limitations**

607 The sample size used in this study was small and imbalanced between MDD (N=36)  
608 and HC (N=26) groups. This may have biased the dFNC clustering process towards  
609 MDD-related states. Although a modest proportion of subjects did not visit dFNC states  
610 2 and 3 during rest or brooding (i.e., fraction of time = 0), these proportions were similar  
611 in both groups suggesting that such densely connected dFNC states may be occupied  
612 less commonly in general. To increase generalizability, our MDD inclusion criteria did  
613 not consider the dosage and duration of antidepressant medication use, which could  
614 have impacted our findings. Brain areas relevant to MDD such as cerebellum (Phillips et  
615 al., 2015), subgenual ACC (Cash et al., 2021), and inferior and polar temporal areas  
616 (Berman et al., 2014) were excluded from the whole-brain fMRI analysis, due to issues  
617 of MRI signal dropout and limited field-of-view coverage identified during quality  
618 assessment. Future studies should examine whole-brain dynamic FC associated with  
619 brooding using larger and more balanced samples.

620

621 We did not find any significant pre-to-post neurofeedback dFNC changes in the HC  
622 groups, likely because of the small sample size and low scope for improvement in  
623 brooding from baseline among healthy individuals compared to MDD subjects.  
624 Additionally, compared to resting-state, the brooding condition was found to be more  
625 sensitive to dFNC changes associated with RRS-B. However, our experimental design  
626 did not include a brooding condition post-neurofeedback. Consequently, changes in  
627 brooding-related dFNC associated with neurofeedback were examined in resting-state,

628 which may not be as sensitive as mood-induction tasks in capturing neuronal indices of  
629 brooding and rumination (Berman et al., 2014; Chen (陈) & Yan (颜), 2021;  
630 Misaki et al., 2023), contributing to the weak effects observed in the exploratory  
631 neurofeedback analysis. These exploratory findings should hence be interpreted with  
632 caution, since the observed significance did not survive correction for multiple  
633 comparisons, and group by time interaction effects were not considered due to the small  
634 subgroup sizes. Causality cannot be implied, as these findings only suggest potential  
635 associations and therapeutic pathways of neurofeedback action on brooding in MDD.  
636 Larger fMRI studies with brooding condition pre- and post-neurofeedback, and  
637 longitudinal follow-up assessments in the future will help inform the durability of these  
638 observed effects on depressive symptomatology and overall cognitive function.

639

## 640 **Conclusion**

641 We investigated whole-brain dynamic functional network connectivity (dFNC) in  
642 depressed and healthy individuals during rest and brooding. We found one brain state  
643 (dFNC state 3) with distinct FC profiles, whose temporal dynamics were most related to  
644 brooding severity, an important symptom and prognostic factor of depression. This  
645 dFNC state was densely connected with moderate-to-strong intra- and inter-network FC  
646 involving several default-mode, somatomotor, attention, visual, central executive,  
647 salience and thalamic areas. Greater time spent and dwell time (stability) in this dFNC  
648 state during brooding (but not rest) was significantly associated with lower brooding  
649 severity in the major depressive disorder (MDD) group, denoting the state's potential to  
650 offer protection against brooding in MDD. Exploratory analysis revealed that active (and

651 not sham) real-time fMRI neurofeedback targeting PCC-TPJ FC in MDD can potentially  
652 increase the time spent in this dFNC state. This work highlights the utility of dynamic FC  
653 and mood-induction tasks for investigating fast timescale fluctuations in fMRI brain  
654 connectivity patterns associated with a critical symptom of MDD, and presents the  
655 promise of real-time fMRI neurofeedback as a tool to cultivate or suppress specific brain  
656 states and modulate their dynamics, offering novel insights into personalized non-  
657 invasive treatment approaches for depression.

658

659

660

661

662

663

664

665

666

667

668

669

670

## 671 **References**

- 672 Allen, E. A., Damaraju, E., Plis, S. M., Erhardt, E. B., Eichele, T., & Calhoun, V. D. (2014).  
673 Tracking whole-brain connectivity dynamics in the resting state. *Cerebral Cortex*, *24*(3),  
674 663–676.
- 675 Allen, E. A., Erhardt, E. B., Damaraju, E., Gruner, W., Segall, J. M., Silva, R. F., Havlicek, M.,  
676 Rachakonda, S., Fries, J., Kalyanam, R., Michael, A. M., Caprihan, A., Turner, J. A.,  
677 Eichele, T., Adelsheim, S., Bryan, A. D., Bustillo, J., Clark, V. P., Feldstein Ewing, S. W., ...  
678 Calhoun, V. D. (2011). A baseline for the multivariate comparison of resting-state networks.  
679 *Frontiers in Systems Neuroscience*, *5*, 2.
- 680 Avants, B. B., Tustison, N., Song, G., & Others. (2009). Advanced normalization tools (ANTs).  
681 *The Insight Journal*, *2*(365), 1–35.
- 682 Bell, A. J., & Sejnowski, T. J. (1995). An information-maximization approach to blind separation  
683 and blind deconvolution. *Neural Computation*, *7*(6), 1129–1159.
- 684 Berman, M. G., Misic, B., Buschkuhl, M., Kross, E., Deldin, P. J., Peltier, S., Churchill, N. W.,  
685 Jaeggi, S. M., Vakorin, V., McIntosh, A. R., & Jonides, J. (2014). Does resting-state  
686 connectivity reflect depressive rumination? A tale of two analyses. *NeuroImage*, *103*, 267–  
687 279.
- 688 Berman, M. G., Peltier, S., Nee, D. E., Kross, E., Deldin, P. J., & Jonides, J. (2011). Depression,  
689 rumination and the default network. *Social Cognitive and Affective Neuroscience*, *6*(5),  
690 548–555.
- 691 Bessette, K. L., Jacobs, R. H., Heleniak, C., Peters, A. T., Welsh, R. C., Watkins, E. R., &  
692 Langenecker, S. A. (2020). Malleability of rumination: An exploratory model of CBT-based  
693 plasticity and long-term reduced risk for depressive relapse among youth from a pilot  
694 randomized clinical trial. *PLoS One*, *15*(6), e0233539.
- 695 Calhoun, V. D., Adali, T., Pearlson, G. D., & Pekar, J. J. (2001). A method for making group

- 696 inferences from functional MRI data using independent component analysis. *Human Brain*  
697 *Mapping*, 14(3), 140–151.
- 698 Calhoun, V. D., Kiehl, K. A., & Pearlson, G. D. (2008). Modulation of temporally coherent brain  
699 networks estimated using ICA at rest and during cognitive tasks. *Human Brain Mapping*,  
700 29(7), 828–838.
- 701 Calhoun, V. D., Miller, R., Pearlson, G., & Adalı, T. (2014). The Chronnectome: Time-Varying  
702 Connectivity Networks as the Next Frontier in fMRI Data Discovery. *Neuron*, 84(2), 262–  
703 274.
- 704 Cash, R. F. H., Cocchi, L., Lv, J., Fitzgerald, P. B., & Zalesky, A. (2021). Functional Magnetic  
705 Resonance Imaging–Guided Personalization of Transcranial Magnetic Stimulation  
706 Treatment for Depression. *JAMA Psychiatry*, 78(3), 337–339.
- 707 Chang, C., Cunningham, J. P., & Glover, G. H. (2009). Influence of heart rate on the BOLD  
708 signal: the cardiac response function. *NeuroImage*, 44(3), 857–869.
- 709 Chen ( 超 ), X., & Yan ( 超 ), C.-G. (2021). Hypostability in the default mode network and  
710 hyperstability in the frontoparietal control network of dynamic functional architecture during  
711 rumination. *NeuroImage*, 241, 118427.
- 712 Cohen, J. R. (2018). The behavioral and cognitive relevance of time-varying, dynamic changes  
713 in functional connectivity. *NeuroImage*, 180(Pt B), 515–525.
- 714 Cordes, D., Haughton, V. M., Arfanakis, K., Wendt, G. J., Turski, P. A., Moritz, C. H., Quigley,  
715 M. A., & Meyerand, M. E. (2000). Mapping functionally related regions of brain with  
716 functional connectivity MR imaging. *AJNR. American Journal of Neuroradiology*, 21(9),  
717 1636–1644.
- 718 Cox, R. W., & Hyde, J. S. (1997). Software tools for analysis and visualization of fMRI data.  
719 *NMR in Biomedicine*, 10(4-5), 171–178.
- 720 Dosenbach, N. U. F., Fair, D. A., Miezin, F. M., Cohen, A. L., Wenger, K. K., Dosenbach, R. A.

- 721 T., Fox, M. D., Snyder, A. Z., Vincent, J. L., Raichle, M. E., Schlaggar, B. L., & Petersen, S.  
722 E. (2007). Distinct brain networks for adaptive and stable task control in humans.  
723 *Proceedings of the National Academy of Sciences of the United States of America*,  
724 *104*(26), 11073–11078.
- 725 Ehring, T., & Watkins, E. R. (2008). Repetitive negative thinking as a transdiagnostic process.  
726 *International Journal of Cognitive Therapy*, *1*(3), 192–205.
- 727 Erhardt, E. B., Rachakonda, S., Bedrick, E. J., Allen, E. A., Adali, T., & Calhoun, V. D. (2011).  
728 Comparison of multi-subject ICA methods for analysis of fMRI data. *Human Brain Mapping*,  
729 *32*(12), 2075–2095.
- 730 Esteban, O., Markiewicz, C. J., Blair, R. W., Moodie, C. A., Isik, A. I., Erramuzpe, A., Kent, J. D.,  
731 Goncalves, M., DuPre, E., Snyder, M., Oya, H., Ghosh, S. S., Wright, J., Durnez, J.,  
732 Poldrack, R. A., & Gorgolewski, K. J. (2019). fMRIPrep: a robust preprocessing pipeline for  
733 functional MRI. *Nature Methods*, *16*(1), 111–116.
- 734 Friedman, J., Hastie, T., & Tibshirani, R. (2008). Sparse inverse covariance estimation with the  
735 graphical lasso. *Biostatistics*, *9*(3), 432–441.
- 736 Ganesan, S., Lv, J., & Zalesky, A. (2022). Multi-timepoint pattern analysis: Influence of  
737 personality and behavior on decoding context-dependent brain connectivity dynamics.  
738 *Human Brain Mapping*, *43*(4), 1403–1418.
- 739 Glover, G. H., Li, T. Q., & Ress, D. (2000). Image-based method for retrospective correction of  
740 physiological motion effects in fMRI: RETROICOR. *Magnetic Resonance in Medicine: Official Journal of the Society of Magnetic Resonance in Medicine / Society of Magnetic Resonance in Medicine*, *44*(1), 162–167.
- 743 Greve, D. N., & Fischl, B. (2009). Accurate and robust brain image alignment using boundary-based registration. *NeuroImage*, *48*(1), 63–72.
- 745 Griffanti, L., Douaud, G., Bijsterbosch, J., Evangelisti, S., Alfaro-Almagro, F., Glasser, M. F.,  
746 Duff, E. P., Fitzgibbon, S., Westphal, R., Carone, D., Beckmann, C. F., & Smith, S. M.



- 747 (2017). Hand classification of fMRI ICA noise components. *NeuroImage*, *154*, 188–205.
- 748 Hamilton, J. P., Farmer, M., Fogelman, P., & Gotlib, I. H. (2015). Depressive Rumination, the  
749 Default-Mode Network, and the Dark Matter of Clinical Neuroscience. *Biological Psychiatry*,  
750 *78*(4), 224–230.
- 751 Harrison, S. J., Bianchi, S., Heinzle, J., Stephan, K. E., Iglesias, S., & Kasper, L. (2021). A  
752 Hilbert-based method for processing respiratory timeseries. *NeuroImage*, *230*, 117787.
- 753 Hutchison, R. M., Womelsdorf, T., Allen, E. A., Bandettini, P. A., Calhoun, V. D., Corbetta, M.,  
754 Della Penna, S., Duyn, J. H., Glover, G. H., Gonzalez-Castillo, J., Handwerker, D. A.,  
755 Keilholz, S., Kiviniemi, V., Leopold, D. A., de Pasquale, F., Sporns, O., Walter, M., &  
756 Chang, C. (2013). Dynamic functional connectivity: promise, issues, and interpretations.  
757 *NeuroImage*, *80*, 360–378.
- 758 Hwang, K., Bertolero, M. A., Liu, W. B., & D'Esposito, M. (2017). The Human Thalamus Is an  
759 Integrative Hub for Functional Brain Networks. *The Journal of Neuroscience: The Official*  
760 *Journal of the Society for Neuroscience*, *37*(23), 5594–5607.
- 761 Jacob, Y., Morris, L. S., Huang, K.-H., Schneider, M., Rutter, S., Verma, G., Murrough, J. W., &  
762 Balchandani, P. (2020). Neural correlates of rumination in major depressive disorder: A  
763 brain network analysis. *NeuroImage. Clinical*, *25*, 102142.
- 764 Javaheripour, N., Colic, L., Opel, N., Li, M., Maleki Balajoo, S., Chand, T., Van der Meer, J.,  
765 Krylova, M., Izyurov, I., Meller, T., Goltermann, J., Winter, N. R., Meinert, S., Grotegerd, D.,  
766 Jansen, A., Alexander, N., Usemann, P., Thomas-Odenthal, F., Evermann, U., ... Walter,  
767 M. (2023). Altered brain dynamic in major depressive disorder: state and trait features.  
768 *Translational Psychiatry*, *13*(1), 1–10.
- 769 Javaheripour, N., Li, M., Chand, T., Krug, A., Kircher, T., Dannlowski, U., Nenadić, I., Hamilton,  
770 J. P., Sacchet, M. D., Gotlib, I. H., Walter, H., Frodl, T., Grimm, S., Harrison, B. J., Wolf, C.  
771 R., Olbrich, S., van Wingen, G., Pezawas, L., Parker, G., ... Wagner, G. (2021). Altered  
772 resting-state functional connectome in major depressive disorder: a mega-analysis from the

- 773       PsyMRI consortium. *Translational Psychiatry*, 11(1), 511.
- 774       Kaiser, R. H., Whitfield-Gabrieli, S., Dillon, D. G., Goer, F., Beltzer, M., Minkel, J., Smoski, M.,  
775       Dichter, G., & Pizzagalli, D. A. (2016). Dynamic Resting-State Functional Connectivity in  
776       Major Depression. *Neuropsychopharmacology: Official Publication of the American College*  
777       *of Neuropsychopharmacology*, 41(7), 1822–1830.
- 778       Kasper, L., Bollmann, S., Diaconescu, A. O., Hutton, C., Heinzle, J., Iglesias, S., Hauser, T. U.,  
779       Sebold, M., Manjaly, Z.-M., Pruessmann, K. P., & Stephan, K. E. (2017). The PhysIO  
780       Toolbox for Modeling Physiological Noise in fMRI Data. *Journal of Neuroscience Methods*,  
781       276, 56–72.
- 782       Kim, J., Andrews-Hanna, J. R., Eisenbarth, H., Lux, B. K., Kim, H. J., Lee, E., Lindquist, M. A.,  
783       Losin, E. A. R., Wager, T. D., & Woo, C.-W. (2023). A dorsomedial prefrontal cortex-based  
784       dynamic functional connectivity model of rumination. *Nature Communications*, 14(1), 1–14.
- 785       Kucyi, A., & Davis, K. D. (2014). Dynamic functional connectivity of the default mode network  
786       tracks daydreaming. *NeuroImage*, 100, 471–480.
- 787       Lackner, R. J., & Fresco, D. M. (2016). Interaction effect of brooding rumination and  
788       interoceptive awareness on depression and anxiety symptoms. *Behaviour Research and*  
789       *Therapy*, 85, 43–52.
- 790       Li, X., Qin, F., Liu, J., Luo, Q., Zhang, Y., Hu, J., Chen, Y., Wei, D., & Qiu, J. (2022). An insula-  
791       based network mediates the relation between rumination and interoceptive sensibility in the  
792       healthy population. *Journal of Affective Disorders*, 299, 6–11.
- 793       Li, Y., Dai, X., Wu, H., & Wang, L. (2021). Establishment of Effective Biomarkers for Depression  
794       Diagnosis With Fusion of Multiple Resting-State Connectivity Measures. *Frontiers in*  
795       *Neuroscience*, 15, 729958.
- 796       Lloyd, S. (1982). Least squares quantization in PCM. *IEEE Transactions on Information Theory*  
797       / *Professional Technical Group on Information Theory*, 28(2), 129–137.
- 798       Long, Y., Cao, H., Yan, C., Chen, X., Li, L., Castellanos, F. X., Bai, T., Bo, Q., Chen, G., Chen,

- 799 N., Chen, W., Cheng, C., Cheng, Y., Cui, X., Duan, J., Fang, Y., Gong, Q., Guo, W., Hou,  
800 Z., ... Liu, Z. (2020). Altered resting-state dynamic functional brain networks in major  
801 depressive disorder: Findings from the REST-meta-MDD consortium. *NeuroImage. Clinical*,  
802 26, 102163.
- 803 Menon, V., & Uddin, L. Q. (2010). Saliency, switching, attention and control: a network model of  
804 insula function. *Brain Structure & Function*, 214(5-6), 655–667.
- 805 Misaki, M., Tsuchiyagaito, A., Al Zoubi, O., Paulus, M., Bodurka, J., & Tulsa 1000 Investigators.  
806 (2020). Connectome-wide search for functional connectivity locus associated with  
807 pathological rumination as a target for real-time fMRI neurofeedback intervention.  
808 *NeuroImage. Clinical*, 26, 102244.
- 809 Misaki, M., Tsuchiyagaito, A., Guinjoan, S. M., Rohan, M. L., & Paulus, M. P. (2023). Trait  
810 repetitive negative thinking in depression is associated with functional connectivity in  
811 negative thinking state rather than resting state. *bioRxiv : The Preprint Server for Biology*.  
812 <https://doi.org/10.1101/2023.03.23.533932>
- 813 Misir, E., Alici, Y. H., & Kocak, O. M. (2023). Functional connectivity in rumination: a systematic  
814 review of magnetic resonance imaging studies. *Journal of Clinical and Experimental*  
815 *Neuropsychology*, 45(9), 928–955.
- 816 Montgomery, S. A., & Asberg, M. (1979). A new depression scale designed to be sensitive to  
817 change. *The British Journal of Psychiatry: The Journal of Mental Science*, 134, 382–389.
- 818 Nolen-Hoeksema, S., & Morrow, J. (1991). A prospective study of depression and posttraumatic  
819 stress symptoms after a natural disaster: the 1989 Loma Prieta Earthquake. *Journal of*  
820 *Personality and Social Psychology*, 61(1), 115–121.
- 821 Nolen-Hoeksema, S., Wisco, B. E., & Lyubomirsky, S. (2008). Rethinking Rumination.  
822 *Perspectives on Psychological Science: A Journal of the Association for Psychological*  
823 *Science*, 3(5), 400–424.
- 824 Ordaz, S. J., LeMoult, J., Colich, N. L., Prasad, G., Pollak, M., Popolizio, M., Price, A., Greicius,

- 825 M., & Gotlib, I. H. (2017). Ruminative brooding is associated with salience network  
826 coherence in early pubertal youth. *Social Cognitive and Affective Neuroscience*, 12(2),  
827 298–310.
- 828 Pascual-Marqui, R. D., Michel, C. M., & Lehmann, D. (1995). Segmentation of brain electrical  
829 activity into microstates: model estimation and validation. *IEEE Transactions on Bio-*  
830 *Medical Engineering*, 42(7), 658–665.
- 831 Philippi, C. L., Leutzinger, K., Pessin, S., Cassani, A., Mikel, O., Walsh, E. C., Hoks, R. M., Birn,  
832 R. M., & Abercrombie, H. C. (2022). Neural signal variability relates to maladaptive  
833 rumination in depression. *Journal of Psychiatric Research*, 156, 570–578.
- 834 Phillips, J. R., Hewedi, D. H., Eissa, A. M., & Moustafa, A. A. (2015). The cerebellum and  
835 psychiatric disorders. *Frontiers in Public Health*, 3, 66.
- 836 Pindi, P., Houenou, J., Piguet, C., & Favre, P. (2022). Real-time fMRI neurofeedback as a new  
837 treatment for psychiatric disorders: A meta-analysis. *Progress in Neuro-*  
838 *Psychopharmacology & Biological Psychiatry*, 119, 110605.
- 839 Pisner, D. A., Shumake, J., Beevers, C. G., & Schnyer, D. M. (2019). The superior longitudinal  
840 fasciculus and its functional triple-network mechanisms in brooding. *NeuroImage. Clinical*,  
841 24, 101935.
- 842 Posner, K., Brown, G. K., Stanley, B., Brent, D. A., Yershova, K. V., Oquendo, M. A., Currier, G.  
843 W., Melvin, G. A., Greenhill, L., Shen, S., & Mann, J. J. (2011). The Columbia-Suicide  
844 Severity Rating Scale: initial validity and internal consistency findings from three multisite  
845 studies with adolescents and adults. *The American Journal of Psychiatry*, 168(12), 1266–  
846 1277.
- 847 Rabinovich, M., Friston, K. J., & Varona, P. (2012). Principles of Brain Dynamics: Global State  
848 Interactions. [https://www.semanticscholar.org/Paper/Principles-](https://www.semanticscholar.org/Paper/Principles-Of...https://www.semanticscholar.org/Paper/Principles-Of...)  
849 [Of...https://www.semanticscholar.org/Paper/Principles-Of...](https://www.semanticscholar.org/Paper/Principles-Of...)  
850 <https://www.semanticscholar.org/paper/16a00895df04f9748bbb0ed1d2e868a9a7107509>

- 851 Raichle, M. E. (2015). The brain's default mode network. *Annual Review of Neuroscience*, 38,  
852 433–447.
- 853 Roweis, S. (1997). EM Algorithms for PCA and SPCA. In M. Jordan, M. Kearns, & S. Solla  
854 (Eds.), *Advances in Neural Information Processing Systems* (Vol. 10). MIT Press.  
855 [https://proceedings.neurips.cc/paper\\_files/paper/1997/file/d9731321ef4e063ebbee79298fa](https://proceedings.neurips.cc/paper_files/paper/1997/file/d9731321ef4e063ebbee79298fa36f56-Paper.pdf)  
856 36f56-Paper.pdf
- 857 Satyshur, M. D., Layden, E. A., Gowins, J. R., Buchanan, A., & Gollan, J. K. (2018). Functional  
858 connectivity of reflective and brooding rumination in depressed and healthy women.  
859 *Cognitive, Affective & Behavioral Neuroscience*, 18(5), 884–901.
- 860 Sendi, M. S. E., Salat, D. H., Miller, R. L., & Calhoun, V. D. (2022). Two-step clustering-based  
861 pipeline for big dynamic functional network connectivity data. *Frontiers in Neuroscience*, 16,  
862 895637.
- 863 Sheehan, D. V., Lecrubier, Y., Sheehan, K. H., Amorim, P., Janavs, J., Weiller, E., Hergueta, T.,  
864 Baker, R., & Dunbar, G. C. (1998). The Mini-International Neuropsychiatric Interview  
865 (M.I.N.I.): the development and validation of a structured diagnostic psychiatric interview for  
866 DSM-IV and ICD-10. *The Journal of Clinical Psychiatry*, 59 Suppl 20, 22–33;quiz 34–57.
- 867 Shine, J. M., Lewis, L. D., Garrett, D. D., & Hwang, K. (2023). The impact of the human  
868 thalamus on brain-wide information processing. *Nature Reviews. Neuroscience*, 24(7),  
869 416–430.
- 870 Smith, S. M., Jenkinson, M., Woolrich, M. W., Beckmann, C. F., Behrens, T. E. J., Johansen-  
871 Berg, H., Bannister, P. R., De Luca, M., Drobnjak, I., Flitney, D. E., Niazy, R. K., Saunders,  
872 J., Vickers, J., Zhang, Y., De Stefano, N., Brady, J. M., & Matthews, P. M. (2004).  
873 Advances in functional and structural MR image analysis and implementation as FSL.  
874 *NeuroImage*, 23 Suppl 1, S208–S219.
- 875 Smith, S. M., Miller, K. L., Salimi-Khorshidi, G., Webster, M., Beckmann, C. F., Nichols, T. E.,  
876 Ramsey, J. D., & Woolrich, M. W. (2011). Network modelling methods for FMRI.

- 877 *NeuroImage*, 54(2), 875–891.
- 878 Stevens, F. L., Hurley, R. A., & Taber, K. H. (2011). Anterior cingulate cortex: unique role in  
879 cognition and emotion. *The Journal of Neuropsychiatry and Clinical Neurosciences*, 23(2),  
880 121–125.
- 881 Tian, Y., Margulies, D. S., Breakspear, M., & Zalesky, A. (2020). Topographic organization of  
882 the human subcortex unveiled with functional connectivity gradients. *Nature Neuroscience*,  
883 23(11), 1421–1432.
- 884 Tozzi, L., Staveland, B., Holt-Gosselin, B., Chesnut, M., Chang, S. E., Choi, D., Shiner, M., Wu,  
885 H., Lerma-Usabiaga, G., Sporns, O., Barch, D. M., Gotlib, I. H., Hastie, T. J., Kerr, A. B.,  
886 Poldrack, R. A., Wandell, B. A., Wintermark, M., & Williams, L. M. (2020). The human  
887 connectome project for disordered emotional states: Protocol and rationale for a research  
888 domain criteria study of brain connectivity in young adult anxiety and depression.  
889 *NeuroImage*, 214, 116715.
- 890 Treynor, W., Gonzalez, R., & Nolen-Hoeksema, S. (2003). Rumination Reconsidered: A  
891 Psychometric Analysis. *Cognitive Therapy and Research*, 27(3), 247–259.
- 892 Tse, N. Y., Ratheesh, A., Ganesan, S., Zalesky, A., & Cash, R. F. H. (2023). Functional  
893 dysconnectivity in youth depression: Systematic review, meta-analysis, and network-based  
894 integration. *Neuroscience and Biobehavioral Reviews*, 153, 105394.
- 895 Tsuchiyagaito, A., Misaki, M., Kirlic, N., Yu, X., Sánchez, S. M., Cochran, G., Stewart, J. L.,  
896 Smith, R., Fitzgerald, K. D., Rohan, M. L., Paulus, M. P., & Guinjoan, S. M. (2023). Real-  
897 Time fMRI Functional Connectivity Neurofeedback Reducing Repetitive Negative Thinking  
898 in Depression: A Double-Blind, Randomized, Sham-Controlled Proof-of-Concept Trial.  
899 *Psychotherapy and Psychosomatics*, 92(2), 87–100.
- 900 Tsuchiyagaito, A., Misaki, M., Zoubi, O. A., Tulsa 1000 Investigators, Paulus, M., & Bodurka, J.  
901 (2021). Prevent breaking bad: A proof of concept study of rebalancing the brain's  
902 rumination circuit with real-time fMRI functional connectivity neurofeedback. *Human Brain*

- 903        *Mapping*, 42(4), 922–940.
- 904    Uddin, L. Q., Yeo, B. T. T., & Spreng, R. N. (2019). Towards a Universal Taxonomy of Macro-  
905        scale Functional Human Brain Networks. *Brain Topography*, 32(6), 926–942.
- 906    Varoquaux, G., Gramfort, A., Poline, J., & Thirion, B. (2010). Brain covariance selection: better  
907        individual functional connectivity models using population prior. *Advances in Neural*  
908        *Information Processing Systems*. <https://arxiv.org/pdf/1008.5071.pdf>
- 909    Watkins, E. R. (2009a). Depressive Rumination and Co-Morbidity: Evidence for Brooding as a  
910        Transdiagnostic Process. *Journal of Rational-Emotive and Cognitive-Behavior Therapy:*  
911        *RET*, 27(3), 160–175.
- 912    Watkins, E. R. (2009b). Depressive rumination: investigating mechanisms to improve cognitive  
913        behavioural treatments. *Cognitive Behaviour Therapy*, 38 Suppl 1(S1), 8–14.
- 914    Wu, X., He, H., Shi, L., Xia, Y., Zuang, K., Feng, Q., Zhang, Y., Ren, Z., Wei, D., & Qiu, J.  
915        (2019). Personality traits are related with dynamic functional connectivity in major  
916        depression disorder: A resting-state analysis. *Journal of Affective Disorders*, 245, 1032–  
917        1042.
- 918    Xu, M., Zhang, X., Li, Y., Chen, S., Zhang, Y., Zhou, Z., Lin, S., Dong, T., Hou, G., & Qiu, Y.  
919        (2022). Identification of suicidality in patients with major depressive disorder via dynamic  
920        functional network connectivity signatures and machine learning. *Translational Psychiatry*,  
921        12(1), 383.
- 922    Yao, Z., Shi, J., Zhang, Z., Zheng, W., Hu, T., Li, Y., Yu, Y., Zhang, Z., Fu, Y., Zou, Y., Zhang,  
923        W., Wu, X., & Hu, B. (2019). Altered dynamic functional connectivity in weakly-connected  
924        state in major depressive disorder. *Clinical Neurophysiology: Official Journal of the*  
925        *International Federation of Clinical Neurophysiology*, 130(11), 2096–2104.
- 926    Yeo, B. T. T., Krienen, F. M., Sepulcre, J., Sabuncu, M. R., Lashkari, D., Hollinshead, M.,  
927        Roffman, J. L., Smoller, J. W., Zöllei, L., Polimeni, J. R., Fischl, B., Liu, H., & Buckner, R. L.  
928        (2011). The organization of the human cerebral cortex estimated by intrinsic functional

- 929 connectivity. *Journal of Neurophysiology*, 106(3), 1125–1165.
- 930 Zhang, Y., Brady, M., & Smith, S. (2001). Segmentation of brain MR images through a hidden  
931 Markov random field model and the expectation-maximization algorithm. *IEEE Transactions*  
932 *on Medical Imaging*, 20(1), 45–57.
- 933 Zhou, H.-X., Chen, X., Shen, Y.-Q., Li, L., Chen, N.-X., Zhu, Z.-C., Castellanos, F. X., & Yan, C.-  
934 G. (2020). Rumination and the default mode network: Meta-analysis of brain imaging  
935 studies and implications for depression. *NeuroImage*, 206, 116287.
- 936
